# Supplementary material for: Construction of Laminated Luminescent Solar Concentrator “Smart” Window Based on Thermoresponsive Polymer and Carbon Quantum Dots
Source: MDPI journal article supplement (doi:10.3390/cryst12111612), 2022-11-11
Supplement: s1 [file s1]

Archive with 1 entries (1 files):
- crystals-2004458-supplementary.pdf
